# Supplementary material for: Norepinephrine triggers an immediate-early regulatory network response in primary human white adipocytes
Source: PubMed Central journal article supplement (PMC6215669; doi:10.1186/s12864-018-5173-0), 2018-11-03
Supplement: 12864_2018_5173_MOESM2_ESM.pdf [file 12864_2018_5173_MOESM2_ESM.pdf]

**ADIPOQ**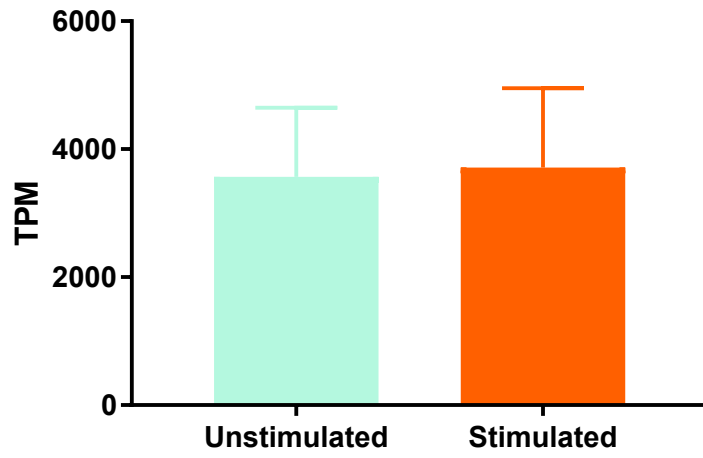**FABP4**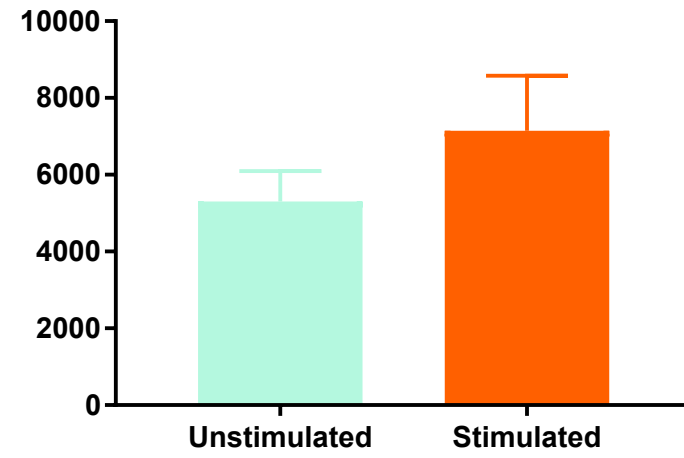**LGALS3 (MAC2)**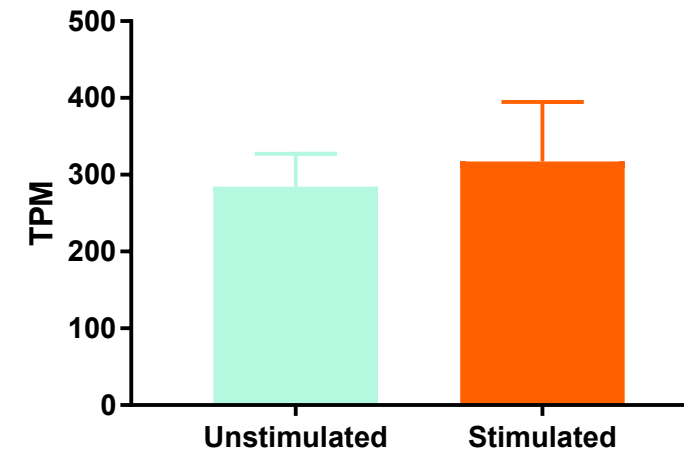

Adipocyte markers

Non-specific marker

**ADGRE1 (F4/80)**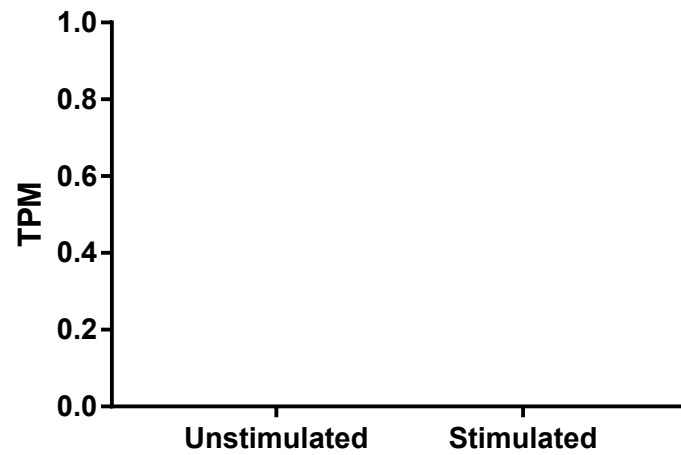**ARG1**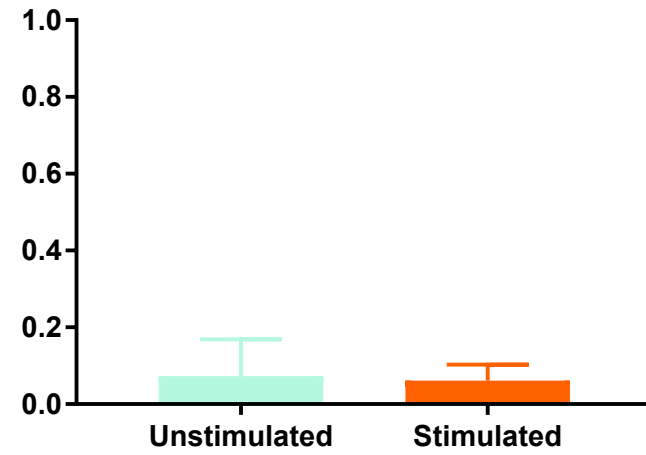**ITGAM (CD11b)**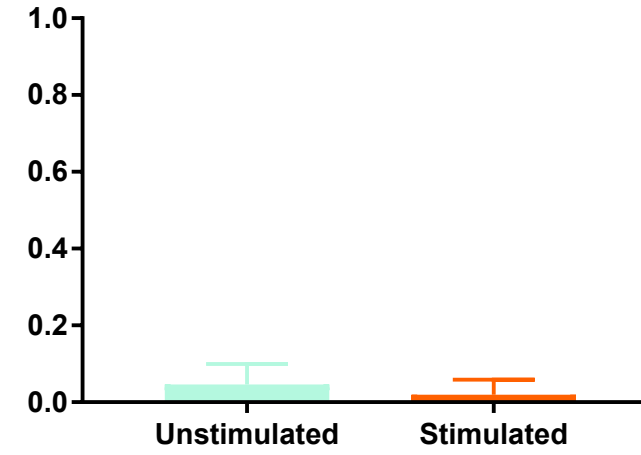**ITGAX (CD11c)**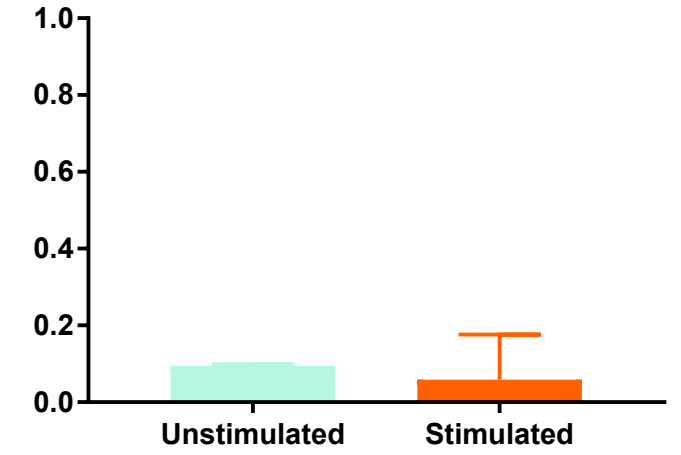**CD68**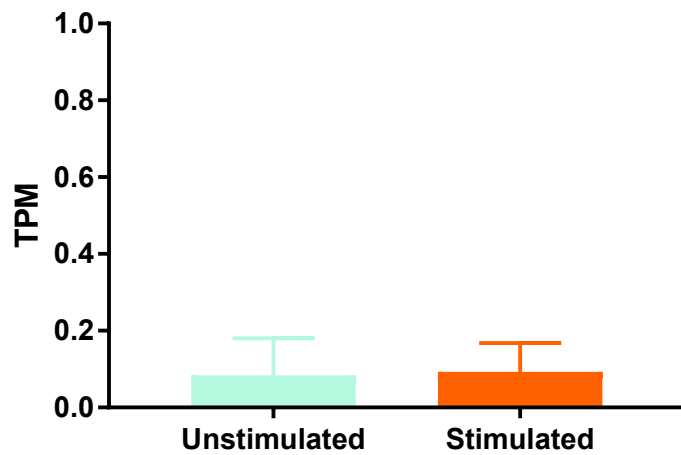**CD86**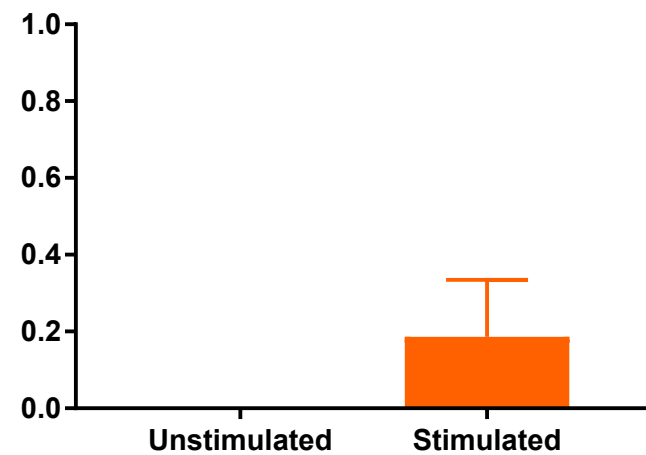**CD163**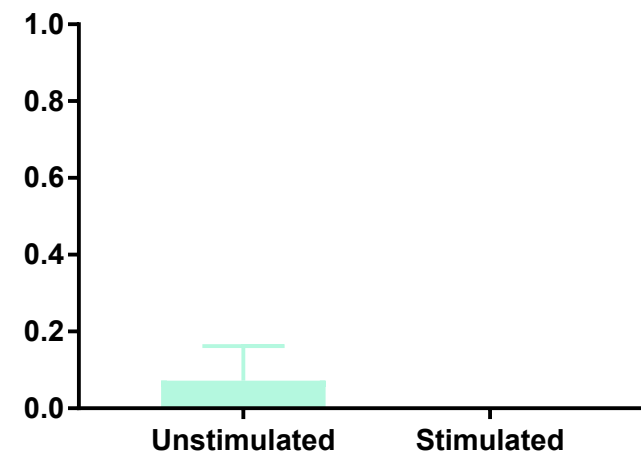**NOS2 (iNOS)**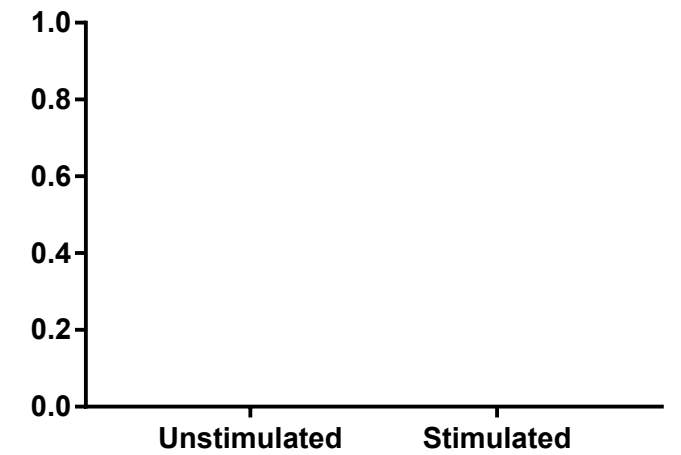

Macrophage markers
